# Supplementary material
Source: Springer Nature journal article supplement (https://www.springermedizin.de/resource/supplementary/13011_2011_166_MOESM2_ESM.pdf/9628532)

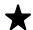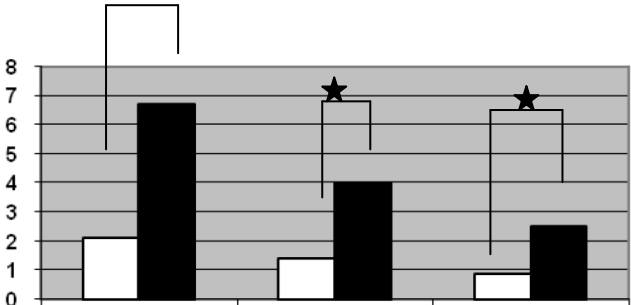

□ Abstainers  
■ Relapsers

OCDS total score

CC

DO

Supplement: MOESM2 [file 9628532]
